# Supplementary material for: Etiology and clinical characteristics of SARS-CoV-2 and other human coronaviruses among children in Zhejiang Province, China 2017–2019
Source: Springer Nature journal article supplement (doi:10.1186/s12985-021-01562-8), 2021-04-30
Supplement: MOESM1 [file 19122390]

Supplementary table 1

Supplementary table 1 Sequences of oligonucleotides used for molecular analysis.

| Two-Tube Assay | Virus | primer           | Target gene | Primer set 5'-3'                                                                                                     | Size (bp) | Concentrations* |
|----------------|-------|------------------|-------------|----------------------------------------------------------------------------------------------------------------------|-----------|-----------------|
| Tube 1         |       |                  |             |                                                                                                                      |           |                 |
|                | HRV   | HRV-F<br>HRV-R   | 5'-UTR      | <u>GTACGACTCACTATAGGG</u> ACCCCTGAATGYGGCTAACCT<br><u>GTACGACTCACTATAGGG</u> ACGGACACCCAAAGTAGTYGGT                  | 145       | 75 nM/L         |
|                | FluB  | FluB-F<br>FluB-R | M           | <u>GTACGACTCACTATAGGG</u> AAAAAGRAGATTCATCACAGAGC<br><u>GTACGACTCACTATAGGG</u> ATTCTGCTATTTCAAATGCTTCA               | 167       | 50 nM/L         |
|                | 229E  | 229E-F<br>229E-R | N           | <u>GTACGACTCACTATAGGG</u> ACTCGGAATCCTTCAAGTGACAGA<br><u>GTACGACTCACTATAGGG</u> AACGAGAAGGCTTAGGAGTAC                | 184       | 50 nM/L         |
|                | OC43  | OC43-F<br>OC43-R | N           | <u>GTACGACTCACTATAGGG</u> AATTGCACCAGGAGTCCCA<br><u>GTACGACTCACTATAGGG</u> ATATCGGTGCCGTACTGGTCT                     | 200       | 50 nM/L         |
|                | HKU1  | HKU1-F<br>HKU1-R | N           | <u>GTACGACTCACTATAGGG</u> ATATAGTRAAACCTGATATGGCT<br><u>GTACGACTCACTATAGGG</u> ATACCAAAACACTGTTGAACAT                | 221       | 50 nM/L         |
|                | PIV3  | PIV3-F<br>PIV3-R | HA          | <u>GTACGACTCACTATAGGG</u> ATTGTCAATTATGATGGYTCAATCT<br><u>GTACGACTCACTATAGGG</u> ATTTTTGACACCCAGTTGTGTTGCAG          | 236       | 50 nM/L         |
|                | FluA  | FluA-F<br>FluA-R | M           | <u>GTACGACTCACTATAGGG</u> ACATTGGGATCTTGCACTTGATATT<br><u>GTACGACTCACTATAGGG</u> ATTTTTTTTTGTAGAAACAAGGTAGTTTTTTACTC | 265       | 100 nM/L        |
|                | PIV1  | PIV1-F<br>PIV1-R | HA          | <u>GTACGACTCACTATAGGG</u> ATCTCATTATTACCYGGACCAA<br><u>GTACGACTCACTATAGGG</u> ATCCTGTTGTCGTTGATGTCATA                | 285       | 87.5 nM/L       |
|                | ADV   | ADV-F<br>ADV-R   | Hexon       | <u>GTACGACTCACTATAGGG</u> AGCCSCARTGGKCWACATGCACATC<br><u>GTACGACTCACTATAGGG</u> ACAGCACSCCICGRATGTCAAA              | 339       | 100 nM/L        |
| Tube 2         |       |                  |             |                                                                                                                      |           |                 |
|                | RSVA  | RSVA-F           | F           | <u>GTACGACTCACTATAGGG</u> ACATCCCCTCTATGCACAACC                                                                      | 159       | 50 nM/L         |

|                         |          |                    |                                                         |     |          |
|-------------------------|----------|--------------------|---------------------------------------------------------|-----|----------|
|                         | RSVA-R   |                    | <u>GTACGACTCACTATAGGGACATGTTTCAGCTTGTGGGAA</u>          |     |          |
| NL63                    | NL63-F   | Polymerase         | <u>GTACGACTCACTATAGGGATCCCAAATGTGATAGAGCTTTGC</u>       | 177 | 50 nM/L  |
|                         | NL63-R   |                    | <u>GTACGACTCACTATAGGGACTGTTAAACTTTGTGCCAACTC</u>        |     |          |
| PIV2                    | PIV2-F   | HA                 | <u>GTACGACTCACTATAGGGATCTACACTGCATCAGCCAGC</u>          | 195 | 50 nM/L  |
|                         | PIV2-R   |                    | <u>GTACGACTCACTATAGGGACCCCTAAAAGAGATGAGCCC</u>          |     |          |
| HMPV                    | HMPV-L-F | L                  | <u>GTACGACTCACTATAGGGACATGCCCACTATAAAAGGTCAG</u>        | 209 | 100 nM/L |
|                         | HMPV-L-R |                    | <u>GTACGACTCACTATAGGGACACCCCAGTCTTTCTTGAAA</u>          |     |          |
|                         | HMPV-N-F | N                  | <u>GTACGACTCACTATAGGGAGAGCTAAYAGAGTGCTAAGTGATG</u>      | 209 | 50 nM/L  |
|                         | HMPV-N-R |                    | <u>GTACGACTCACTATAGGGA</u> ACTTTCTGCTTTGCTTCCTGT        |     |          |
| RSVB                    | RSVB-F   | F                  | <u>GTACGACTCACTATAGGGAAAACGAAGATTTCTGGGCTTC</u>         | 280 | 75 nM/L  |
|                         | RSVB-R   |                    | <u>GTACGACTCACTATAGGGATGCGACAGCTCTGTTGATTT</u>          |     |          |
| HBoV                    | HBoV-F   | NP1                | <u>GTACGACTCACTATAGGGAAAGAAAAGGGAGTCCAGAA</u>           | 298 | 100 nM/L |
|                         | HBoV-R   |                    | <u>GTACGACTCACTATAGGGATTTTTTTTCTCTGTGTTGACTGAATACAG</u> |     |          |
| PIV4                    | PIV4-F   | Phosphoprot<br>ein | <u>GTACGACTCACTATAGGGACTGAACGGTTGCATTCAGGT</u>          | 480 | 50 nM/L  |
|                         | PIV4-R   |                    | <u>GTACGACTCACTATAGGGATTGCATCAAGAATGAGTCCT</u>          |     |          |
| Internal control primer |          |                    |                                                         |     |          |
| Rnasep                  | Rnasep F | RNase P            | <u>GTACGACTCACTATAGGGAGAGGCCTGGCTTTTGA</u> ACTT         | 126 | 25 nM/L  |
|                         | Rnasep R |                    | <u>GTACGACTCACTATAGGGA</u> ATCAAATTGAGGGCACTGGA         |     |          |
| Universal primer        |          |                    |                                                         |     |          |
|                         | Tag      |                    | <u>GTACGACTCACTATAGGGA</u>                              |     | 10 µM/L  |

\* Varied primer concentrations in 25 µL PCR mixture.

## Supplementary table 2

Supplementary table 2 Primer of S genes for HKU1, HCoV-NL63 and HCoV-OC43.

| Primer  | Sequence 5'-3'            | Location    |
|---------|---------------------------|-------------|
| HKU1 F1 | GCTGTTATAGGTGATTTTAATTG   | 23150-23170 |
| HKU1 R1 | CGTTCCCAATTAAGAGGTGA      | 24130-24150 |
| HKU1 F2 | CCTAATACTGGTGTTTATGA      | 24010-24030 |
| HKU1 R2 | CAATCAATAGTAACTTTAGGAG    | 25550-25570 |
| HKU1 F3 | CAAGGTATTTTTAAAGAAGTTTCTG | 25010-25030 |
| HKU1 R3 | CTATTAAGTGCTTGAGCATTAG    | 26240-26260 |
| HKU1 F4 | GTTTGGGTGTTACTATGGATGTTT  | 26100-26110 |
| HKU1 R4 | CATACTCATCACAACAATTATGAC  | 27130-27150 |
| NL63 F1 | GAGTGGTAGGTTGTTGTTACG     | 20520-20540 |
| NL63 R1 | CCCACAAAAGTGCTAACATGAG    | 21670-21690 |
| NL63 F2 | GCCACTGGTTCTGATGTTAATTG   | 21420-21440 |
| NL63 R2 | CTGGTTGGTTACATGGTGTCAC    | 22610-22630 |
| NL63 F3 | CGTTCTTCAAACCAGTCACTTGC   | 22520-22540 |
| NL63 R3 | GCCTTATTAATGATGCAGCC      | 23520-23540 |
| NL63 F4 | CTTTGGCACTGCAAGCACGAC     | 23440-23460 |
| NL63 R4 | GAGTAAGTTGAAATAGGCCACC    | 24670-24700 |
| OC43 F1 | CTAGGCTGCATGATGCTTAGACC   | 23710-23730 |
| OC43 R1 | GACATCAGGCTGCTCATATT      | 24860-24880 |
| OC43 F2 | AACACAATCTAT AGCACCACC    | 24680-24700 |
| OC43 R2 | CATATAAAAGGTTCTGCCAAC     | 25720-25740 |
| OC43 F3 | GGCATTTTTGTTGAGGTTAATGCG  | 25680-25700 |
| OC43 R3 | CCAATCTATTAGAGAGTTGTTGC   | 26920-26950 |
| OC43 F4 | CCAGTAGATCTGCTATAGAGG     | 26490-26510 |
| OC43 R4 | GACGAACTTAGTCGTCATGTGAAG  | 27830-27850 |
